# Supplementary material
Source: PubMed Central journal article supplement (PMC3358449)
Supplement: NIHMS370780-supplement-01.pdf [file NIHMS370780-supplement-01.pdf]

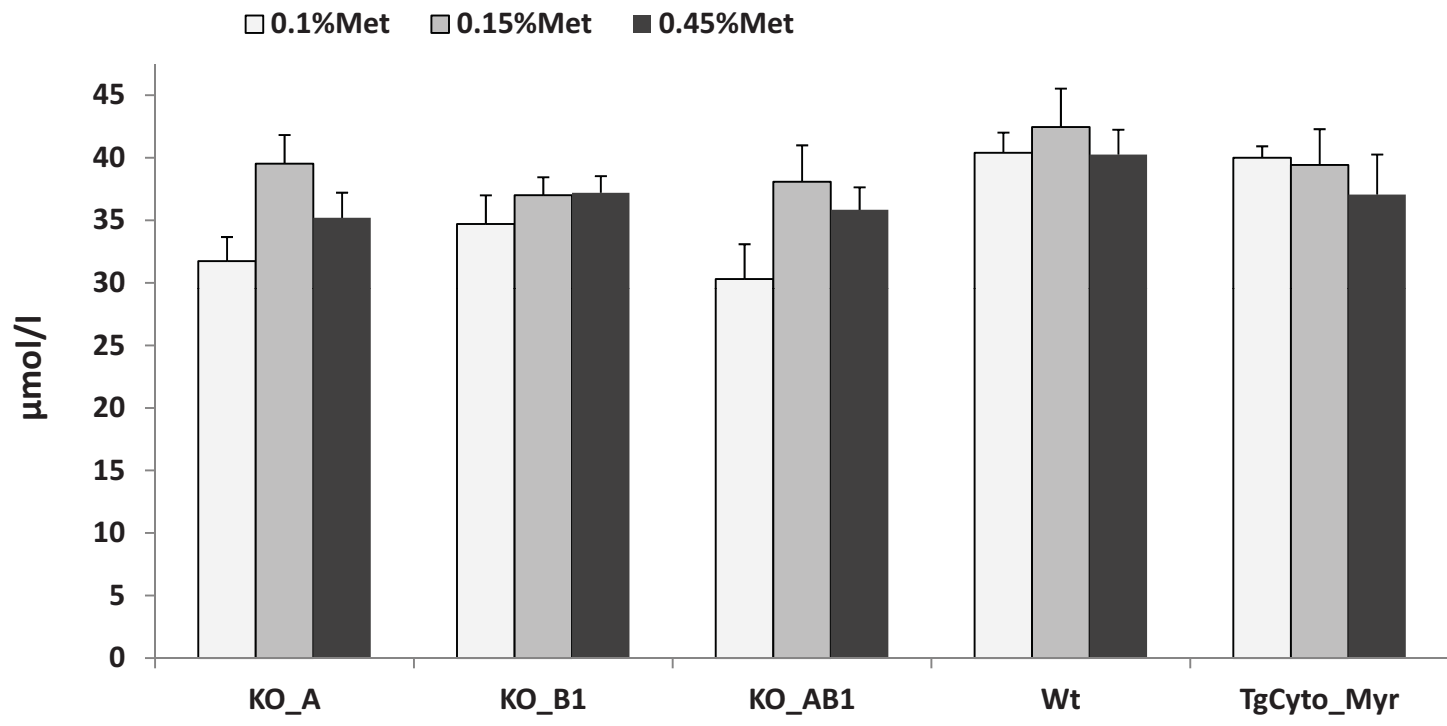

Figure S1. Plasma methionine concentration of mice. The values shown are the mean  $\pm$  SE, n=5.

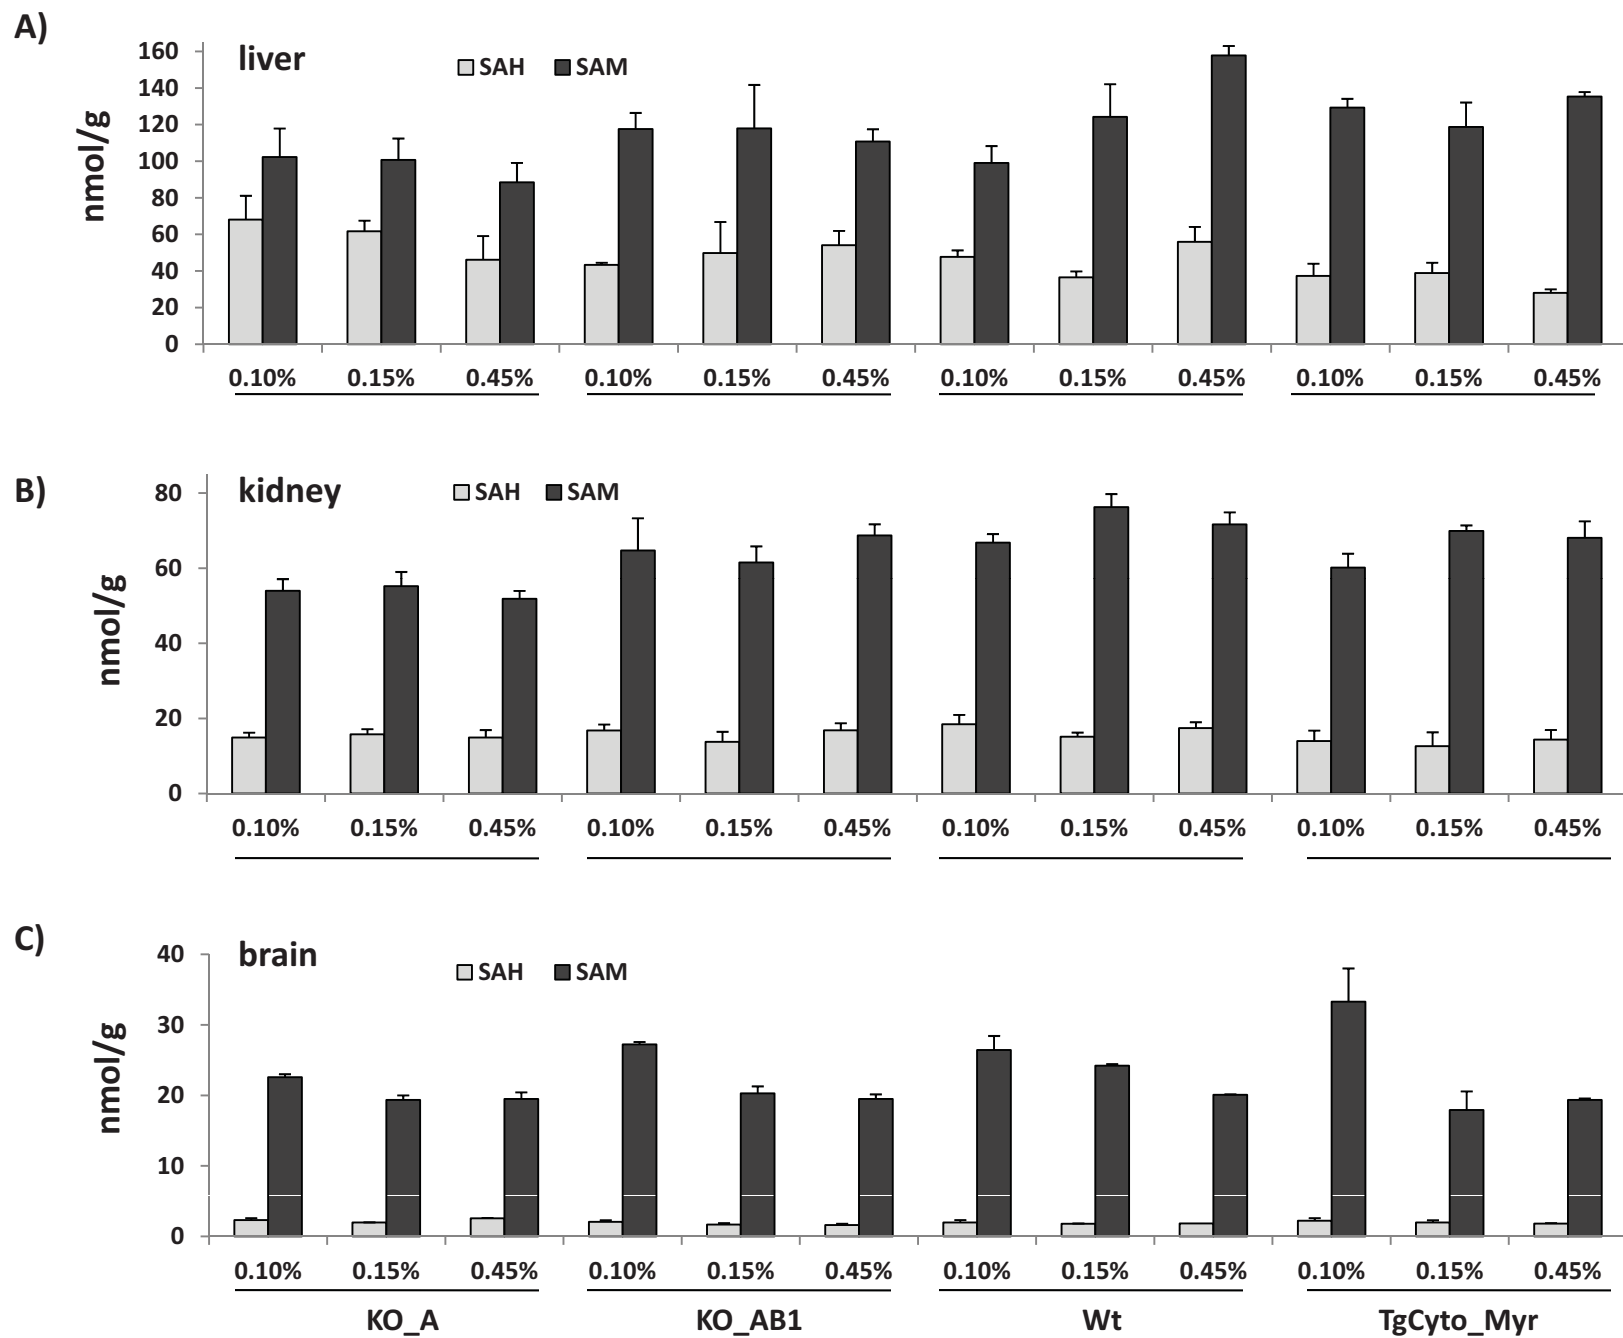

Figure S2. Tissue SAM and SAH content (nmol/g tissue). The values shown are the mean  $\pm$  SE, n=5.

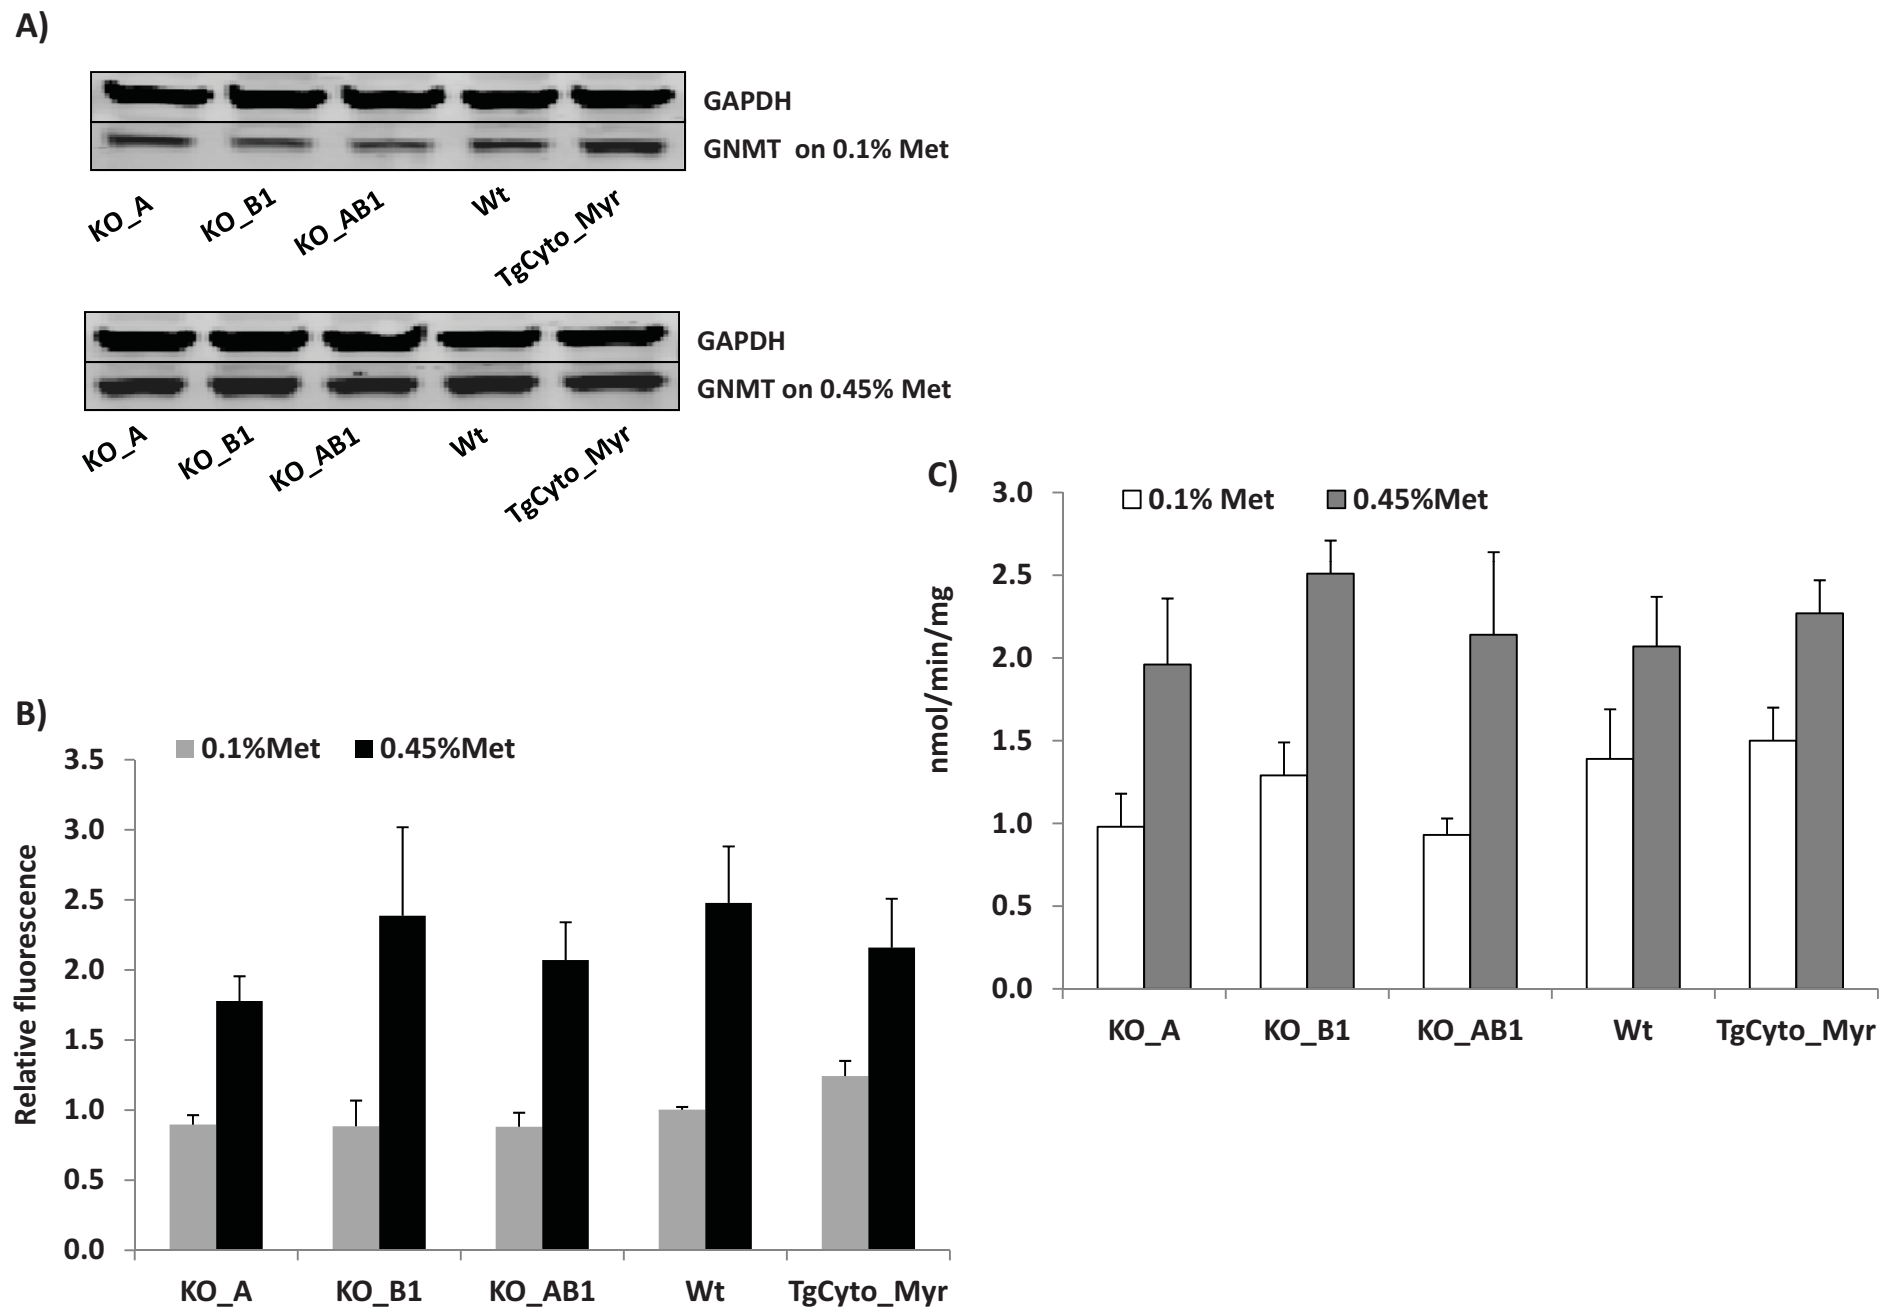

Figure S3. Liver GNMT protein level and activity. A) Immunoblot of GNMT. B) Quantitation of protein levels from the immunoblot. GAPDH served as a loading control and GNMT levels were normalized to GAPDH. C) GNMT activity. The values shown are the mean  $\pm$  SE, n=5.

A)

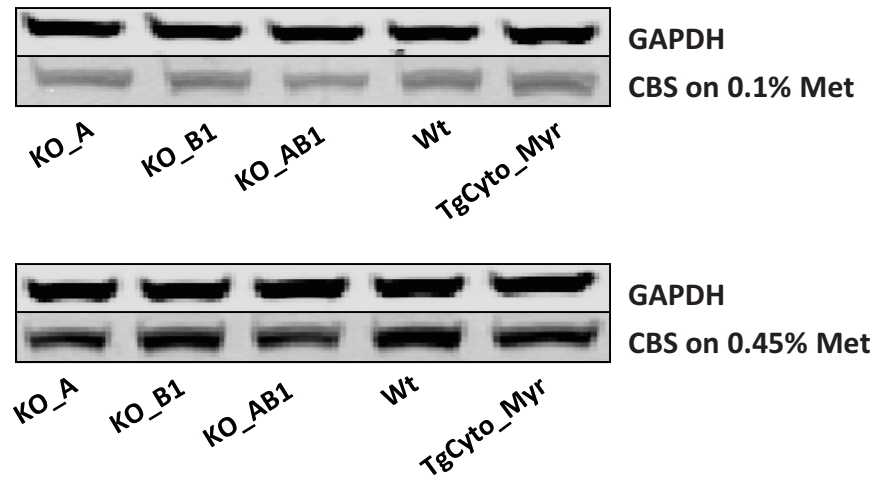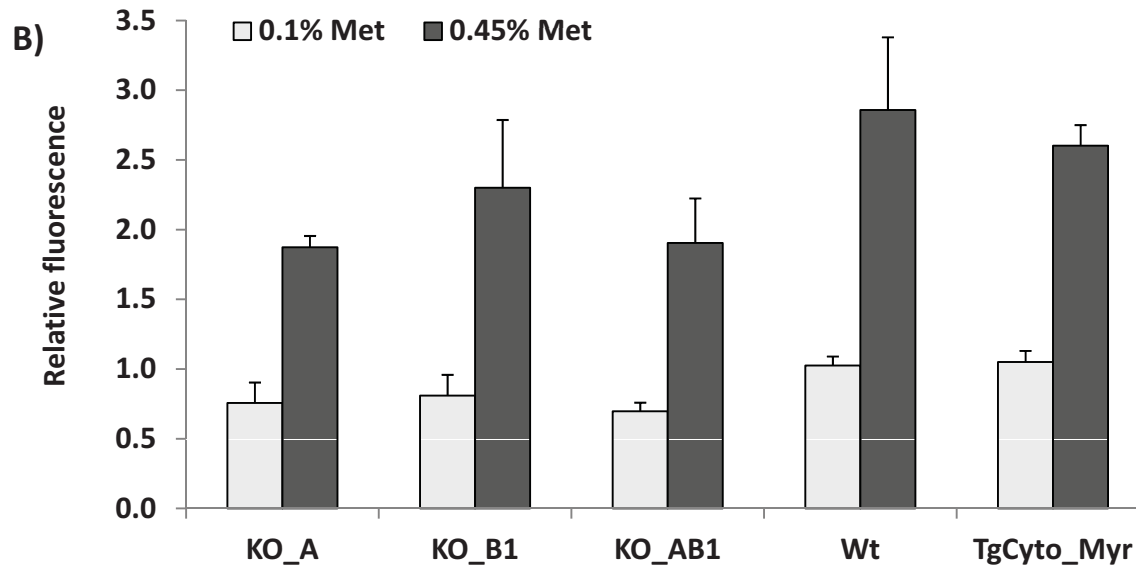

Figure S4. Liver CBS protein level. A) Immunoblot of CBS. B) Quantitation of protein levels from the immunoblot. GAPDH served as a loading control and CBS levels were normalized to GAPDH. The values shown are the mean  $\pm$  SE, n=2 or 3 per genotype.
